# Supplementary material for: Attenuated activation of the unfolded protein response following exercise in skeletal muscle of older adults
Source: publisher site journal article supplement (doi:10.18632/aging.102273), 2019-09-14
Supplement: Supplementary file [file aging-v11i18-102273-supplementary-material-SD1.pdf]

**SUPPLEMENTARY FIGURES**

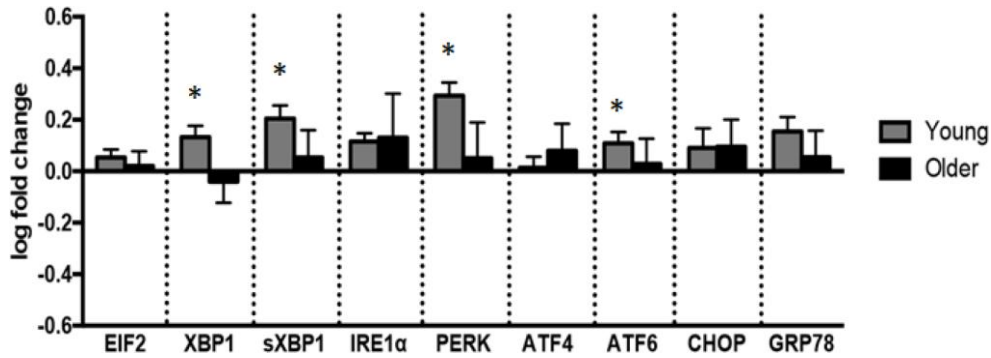

**Supplementary Figure 1. qRT-PCR validation of RNA-Seq.** We verified nine mRNAs associated with the three primary transducers of the UPR. qPCR, quantitative PCR. \*Significant ( $p \leq 0.05$ ) log fold change from baseline within group. Data are means  $\pm$  SEM.

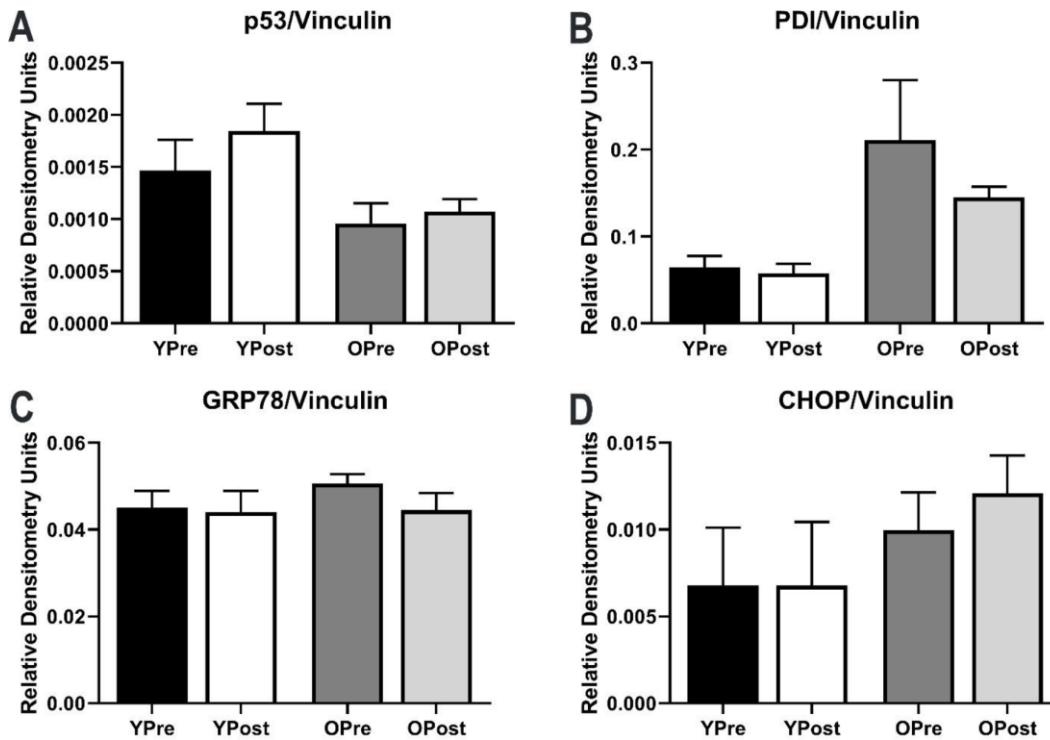

**Supplementary Figure 2.** Protein expression of p53 (A), PDI (B), UPR chaperone GRP78 (C), and PERK arm-associated terminal protein CHOP (D) in young (Y) and older (O) adults at baseline (Pre) and 18h post-exercise (Post). P53 and PDI protein expression was completed for six young and six older adults. CHOP and GRP78 protein expression were completed for three young and three older adults.

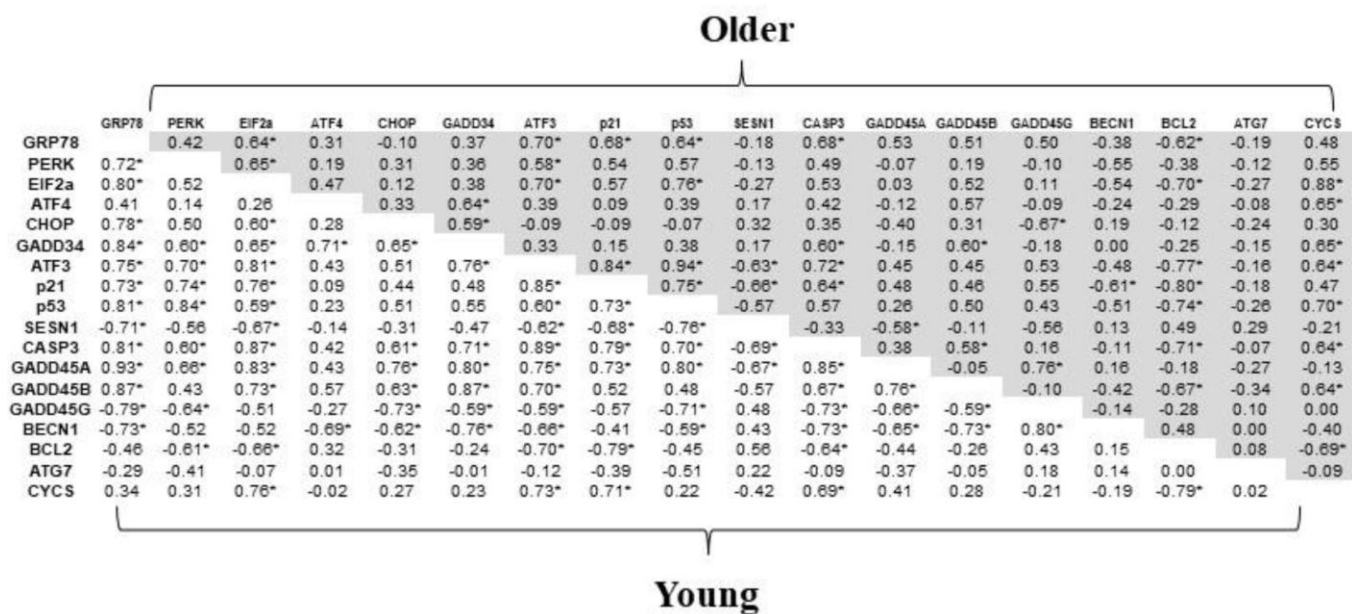

**Supplementary Figure 3. Pearson R correlation values between gene transcripts associated with the PERK arm of the UPR and p53/p21 axis post-exercise in young (lower left) compared to older (upper right) adults.** The correlation values demonstrate relationships displayed in Figure 4C between the fold-change from baseline to 18h post-exercise for the individual gene transcripts associated with the UPR pathway in young and older adults. \*Significant ( $p \leq 0.05$ ) correlation.
